# Supplementary material for: The utilization of formal and informal home care by older patients with cancer: a Belgian cohort study with two control groups
Source: BMC Health Serv Res. 2017 Sep 12;17:644. doi: 10.1186/s12913-017-2594-4 (PMC5596475; doi:10.1186/s12913-017-2594-4)
Supplement: Supplementary file 1 — Amount of home care services per patient at baseline. An overview of the number of home care services per patient at T0 is shown for the three patient groups. (XLSX 16 kb) [file 12913_2017_2594_MOESM1_ESM.xlsx]

## Sheet: Sheet1
Additional file 1. Amount of home care services per patient at baseline
