# Supplementary material for: The utilization of formal and informal home care by older patients with cancer: a Belgian cohort study with two control groups
Source: BMC Health Serv Res. 2017 Sep 12;17:644. doi: 10.1186/s12913-017-2594-4 (PMC5596475; doi:10.1186/s12913-017-2594-4)
Supplement: Supplementary file 3 — Baseline comparisons for care in patients with and without missing 1-year data. Formal care and informal care are compared between patients included in the longitudinal analyses and patients that were lost to follow-up after 1 year. Separate comparisons were made with patients who were lost to follow-up and alive and with patients who had died after 1 year. (XLSX 14 kb) [file 12913_2017_2594_MOESM3_ESM.xlsx]

## Sheet: Sheet1
Additional file 3. Baseline comparisons for care in patients with and without missing 1-year data
	LTFU			Included			died
	n	%	p-value	n	%	p-value	n	%
	n=327			n=469			n=48
OCP	60	18.3486		84	17.9104		17	35.4167
MCP	138	42.2018		190	40.5117		22	45.8333
ONC	129	39.4495		195	41.5778		9	18.75
Formal care			0.057			0.139
Users	106	32.4159		183	39.0192		24	50
Non-users	221	67.5841		286	60.9808		24	50
Individual home care service
Home nursing	40	12.2324	0.747	61	13.0064	0.023	12	25
Home help services	12	3.66972	0.403	23	4.90405	0.684	3	6.25
Cleaning help	86	26.2997	0.022	159	33.9019	0.617	18	37.5
Physiotherapist	20	6.11621	0.608	33	7.03625	0.838	3	6.25
Meals on wheels	13	3.97554	0.841	20	4.26439	0.466	1	2.08333
Informal care	n=315		0.415	n=460		0.008
Present	235	74.6032		331	71.9565		43	89.5833
Not present	80	25.3968		129	28.0435		5	10.4167
formal care + informal care	n=315			n=460
No care	53	16.8254	0.962	78	16.9565	0.021	2	4.16667
Informal care only	161	51.1111	0.036	200	43.4783	0.753	22	45.8333
Formal care only	27	8.57143	0.253	51	11.087	0.301	3	6.25
Informal care + formal care	74	23.4921	0.122	131	28.4783	0.028	21	43.75
Differences in care were tested with the chi-square test
LTFU: lost to follow-up
